# Supplementary material
Source: Springer Nature journal article supplement (https://www.springermedizin.de/resource/supplementary/13075_2009_2752_MOESM5_ESM.pdf/9692802)

Sham

4 weeks

16 weeks

S100A8

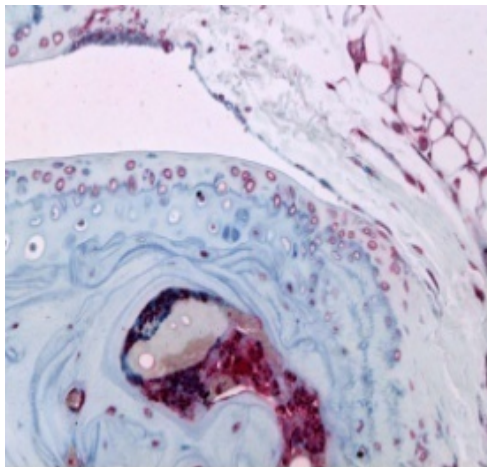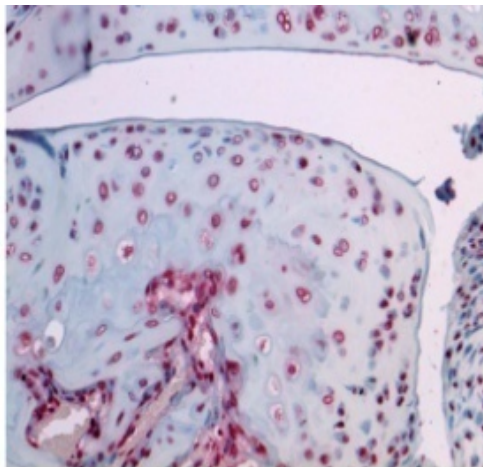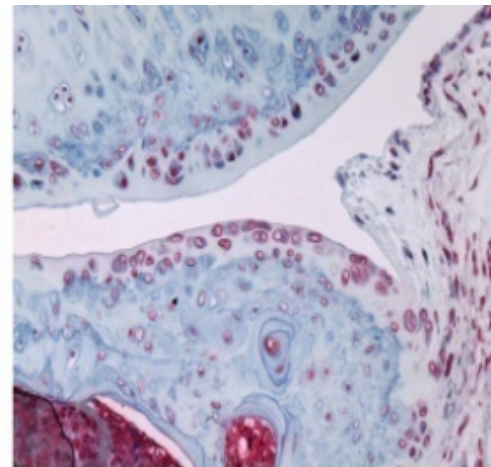

S100A9

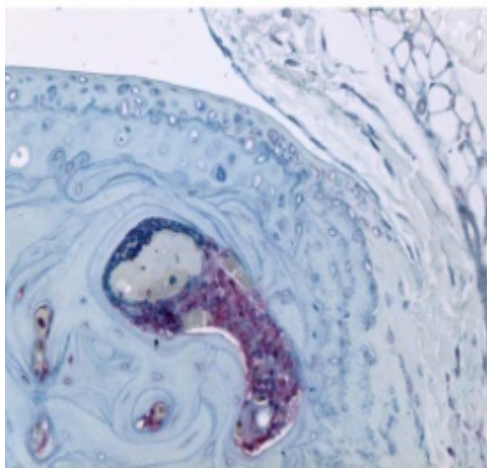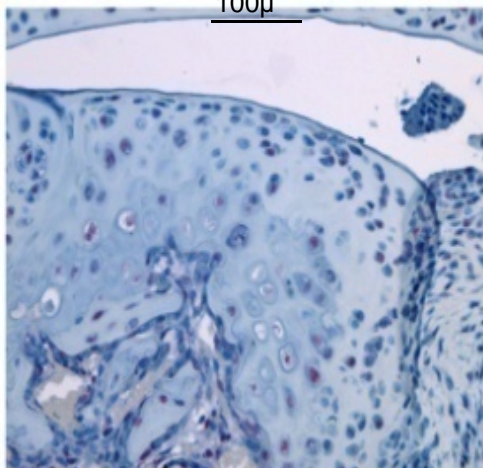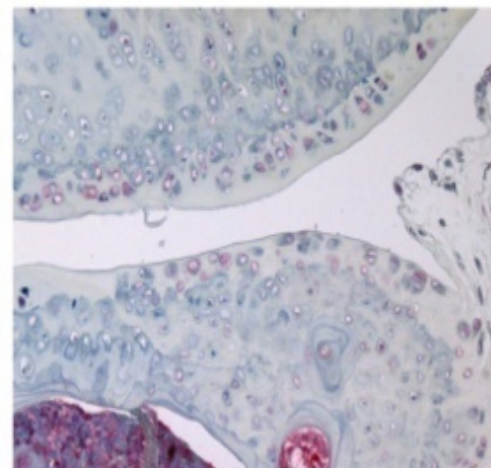

Supplement: MOESM5 [file 9692802]
